# Supplementary material for: Nocturnal substrate association of four coral reef fish groups (parrotfishes, surgeonfishes, groupers and butterflyfishes) in relation to substrate architectural characteristics
Source: PeerJ. 2024 Jul 19;12:e17772. doi: 10.7717/peerj.17772 (PMC11262305; doi:10.7717/peerj.17772)
Supplement: Supplemental Information 29 [file peerj-12-17772-s029.xls]

## Sheet: Left figure
Left figures		Eave-like	Large inter-branch	Overhang by fine branching	Overhang by coarse structure	Uneven	Flat	Macroalgae
(A) Plectropomus leopardus	n	12	2	5	10	0	1	0
	Oi	0.4	0.0666667	0.166667	0.333333	0	0.0333333	0
	Pi	0.13071	0.0634385	0.202754	0.296706	0.0615179	0.23197	0.0129039
(B) Epinephelus ongus	n	15	16	30	45	0	0	0
	Oi	0.141509	0.150943	0.283019	0.424528	0	0	0
	Pi	0.13071	0.0634385	0.202754	0.296706	0.0615179	0.23197	0.0129039

## Sheet: Right figure
Right figures		Corymbose Acropora	Tabular Acropora	Foliose coral	Dead corymbose Acropora	Dead tabular Acropora	Dead foliose coral	Staghorn Acropora	Dead staghorn Acropora	Branching Acropora	Bottlebrush Acropora	Non-acroporid branching coral	Pocillopora	Dead branching Acropora	Dead bottlebruch Acropora	Dead non-acroporid branching coral	Dead Pocillopora	Massive coral	Dead massive coral	Rock	Other coral	Dead other coral	Soft coral	Coral rubble	Sand	Macroalgae
(A) Plectropomus leopardus	n	4	6	0	1	1	0	2	0	0	0	3	1	0	0	1	0	2	1	7	0	0	0	1	0	0
	Oi	0.133333	0.2	0	0.0333333	0.0333333	0	0.0666667	0	0	0	0.1	0.0333333	0	0	0.0333333	0	0.0666667	0.0333333	0.233333	0	0	0	0.0333333	0	0
	Pi	0.0609359	0.0498612	0.00876332	0.00418212	0.00696742	0	0.0482399	0.0151986	0.0611687	0.0476495	0.04745	0.00893793	0.0100853	0.0164707	0.010052	0.000939521	0.0460698	0.00374977	0.246886	0.0545338	0.000340888	0.00664316	0.182275	0.0496949	0.0129039
(B) Epinephelus ongus	n	5	7	0	0	3	0	15	1	2	2	20	2	1	0	3	0	6	0	39	0	0	0	0	0	0
	Oi	0.0471698	0.0660377	0	0	0.0283019	0	0.141509	0.00943396	0.0188679	0.0188679	0.188679	0.0188679	0.00943396	0	0.0283019	0	0.0566038	0	0.367925	0	0	0	0	0	0
	Pi	0.0609359	0.0498612	0.00876332	0.00418212	0.00696742	0	0.0482399	0.0151986	0.0611687	0.0476495	0.04745	0.00893793	0.0100853	0.0164707	0.010052	0.000939521	0.0460698	0.00374977	0.246886	0.0545338	0.000340888	0.00664316	0.182275	0.0496949	0.0129039
