# Supplementary material for: Nocturnal substrate association of four coral reef fish groups (parrotfishes, surgeonfishes, groupers and butterflyfishes) in relation to substrate architectural characteristics
Source: PeerJ. 2024 Jul 19;12:e17772. doi: 10.7717/peerj.17772 (PMC11262305; doi:10.7717/peerj.17772)
Supplement: Supplemental Information 30 [file peerj-12-17772-s030.xls]

## Sheet: Left figure
Left figures		Eave-like	Large inter-branch	Overhang by fine branching	Overhang by coarse structure	Uneven	Flat	Macroalgae
(A) Chaetodon trifascialis	n	9	9	2	1	0	0	0
	Oi	0.428571	0.428571	0.0952381	0.047619	0	0	0
	Pi	0.13071	0.0634385	0.202754	0.296706	0.0615179	0.23197	0.0129039
(B) Chaetodon lunulatus	n	6	43	9	3	0	0	0
	Oi	0.0983607	0.704918	0.147541	0.0491803	0	0	0
	Pi	0.13071	0.0634385	0.202754	0.296706	0.0615179	0.23197	0.0129039
(C) Chaetodon ephippium	n	0	5	0	5	0	0	0
	Oi	0	0.5	0	0.5	0	0	0
	Pi	0.13071	0.0634385	0.202754	0.296706	0.0615179	0.23197	0.0129039
(D) Chaetodon auriga	n	5	2	2	7	0	0	0
	Oi	0.3125	0.125	0.125	0.4375	0	0	0
	Pi	0.13071	0.0634385	0.202754	0.296706	0.0615179	0.23197	0.0129039

## Sheet: Right figure
Right figures		Corymbose Acropora	Tabular Acropora	Foliose coral	Dead corymbose Acropora	Dead tabular Acropora	Dead foliose coral	Staghorn Acropora	Dead staghorn Acropora	Branching Acropora	Bottlebrush Acropora	Non-acroporid branching coral	Pocillopora	Dead branching Acropora	Dead bottlebruch Acropora	Dead non-acroporid branching coral	Dead Pocillopora	Massive coral	Dead massive coral	Rock	Other coral	Dead other coral	Soft coral	Coral rubble	Sand	Macroalgae
(A) Chaetodon trifascialis	n	0	9	0	0	0	0	9	0	2	0	0	0	0	0	0	0	0	0	1	0	0	0	0	0	0
	Oi	0	0.428571	0	0	0	0	0.428571	0	0.0952381	0	0	0	0	0	0	0	0	0	0.047619	0	0	0	0	0	0
	Pi	0.0609359	0.0498612	0.00876332	0.00418212	0.00696742	0	0.0482399	0.0151986	0.0611687	0.0476495	0.04745	0.00893793	0.0100853	0.0164707	0.010052	0.000939521	0.0460698	0.00374977	0.246886	0.0545338	0.000340888	0.00664316	0.182275	0.0496949	0.0129039
(B) Chaetodon lunulatus	n	3	3	0	0	0	0	43	0	6	1	1	1	0	0	0	0	0	0	3	0	0	0	0	0	0
	Oi	0.0491803	0.0491803	0	0	0	0	0.704918	0	0.0983607	0.0163934	0.0163934	0.0163934	0	0	0	0	0	0	0.0491803	0	0	0	0	0	0
	Pi	0.0609359	0.0498612	0.00876332	0.00418212	0.00696742	0	0.0482399	0.0151986	0.0611687	0.0476495	0.04745	0.00893793	0.0100853	0.0164707	0.010052	0.000939521	0.0460698	0.00374977	0.246886	0.0545338	0.000340888	0.00664316	0.182275	0.0496949	0.0129039
(C) Chaetodon ephippium	n	0	0	0	0	0	0	5	0	0	0	0	0	0	0	0	0	0	2	3	0	0	0	0	0	0
	Oi	0	0	0	0	0	0	0.5	0	0	0	0	0	0	0	0	0	0	0.2	0.3	0	0	0	0	0	0
	Pi	0.0609359	0.0498612	0.00876332	0.00418212	0.00696742	0	0.0482399	0.0151986	0.0611687	0.0476495	0.04745	0.00893793	0.0100853	0.0164707	0.010052	0.000939521	0.0460698	0.00374977	0.246886	0.0545338	0.000340888	0.00664316	0.182275	0.0496949	0.0129039
(D) Chaetodon auriga	n	3	0	0	0	2	0	2	0	1	0	1	0	0	0	0	0	1	0	6	0	0	0	0	0	0
	Oi	0.1875	0	0	0	0.125	0	0.125	0	0.0625	0	0.0625	0	0	0	0	0	0.0625	0	0.375	0	0	0	0	0	0
	Pi	0.0609359	0.0498612	0.00876332	0.00418212	0.00696742	0	0.0482399	0.0151986	0.0611687	0.0476495	0.04745	0.00893793	0.0100853	0.0164707	0.010052	0.000939521	0.0460698	0.00374977	0.246886	0.0545338	0.000340888	0.00664316	0.182275	0.0496949	0.0129039
