# Supplementary material for: Nocturnal substrate association of four coral reef fish groups (parrotfishes, surgeonfishes, groupers and butterflyfishes) in relation to substrate architectural characteristics
Source: PeerJ. 2024 Jul 19;12:e17772. doi: 10.7717/peerj.17772 (PMC11262305; doi:10.7717/peerj.17772)
Supplement: Supplemental Information 35 [file peerj-12-17772-s035.xls]

## Sheet: Table 6
Table 6		Corymbose Acropora	Tabular Acropora	Foliose coral	Dead corymbose Acropora	Dead tabular Acropora	Dead foliose coral	Staghorn Acropora	Dead staghorn Acropora	Branching Acropora	Bottlebrush Acropora	Non-acroporid branching coral	Pocillopora	Dead branching Acropora	Dead bottlebruch Acropora	Dead non-acroporid branching coral	Dead Pocillopora	Massive coral	Dead massive coral	Rock	Other coral	Dead other coral	Soft coral	Coral rubble	Sand	Macroalgae
Naso unicornis	n	0	4	0	0	1	0	0	0	0	0	1	0	0	0	0	0	0	1	25	0	0	0	0	0	0
	Resource selection ratio	0	2.50696	0	0	4.48516	0	0	0	0	0	0.658588	0	0	0	0	0	0	8.33384	3.16441	0	0	0	0	0	0
	95CI	0	3.6231	0	0	13.6409	0	0	0	0	0	2.00299	0	0	0	0	0	0	25.346	0.914651	0	0	0	0	0	0
Naso lituratus	n	3	8	0	0	0	0	0	0	0	0	1	1	0	0	0	1	2	0	7	0	0	0	0	0	0
	Resource selection ratio	2.14053	6.97589	0	0	0	0	0	0	0	0	0.916297	4.86447	0	0	0	46.277	1.88749	0	1.23275	0	0	0	0	0	0
	95CI	3.56098	6.15453	0	0	0	0	0	0	0	0	2.76912	14.7008	0	0	0	139.853	3.94071	0	1.20082	0	0	0	0	0	0
Plectropomus leopardus	n	4	6	0	1	1	0	2	0	0	0	3	1	0	0	1	0	2	1	7	0	0	0	1	0	0
	Resource selection ratio	2.18809	4.01114	0	7.97044	4.78417	0	1.38198	0	0	0	2.10748	3.72943	0	0	3.31607	0	1.44708	8.88943	0.945105	0	0	0	0.182873	0	0
	95CI	3.14717	4.5258	0	24.2147	14.5346	0	2.91719	0	0	0	3.56683	11.3302	0	0	10.0744	0	3.0546	27.0067	0.966479	0	0	0	0.555581	0	0
Epinephelus ongus	n	5	7	0	0	3	0	15	1	2	2	20	2	1	0	3	0	6	0	39	0	0	0	0	0	0
	Resource selection ratio	0.774089	1.32443	0	0	4.06203	0	2.93345	0.620711	0.308457	0.395973	3.97638	2.111	0.935417	0	2.81553	0	1.22865	0	1.49026	0	0	0	0	0	0
	95CI	1.04417	1.49487	0	0	7.14343	0	2.1685	1.90893	0.667579	0.856984	2.47473	4.56872	2.87677	0	4.95136	0	1.50542	0	0.586236	0	0	0	0	0	0
Chaetodon trifascialis	n	0	9	0	0	0	0	9	0	2	0	0	0	0	0	0	0	0	0	1	0	0	0	0	0	0
	Resource selection ratio	0	8.5953	0	0	0	0	8.88418	0	1.55698	0	0	0	0	0	0	0	0	0	0.192878	0	0	0	0	0	0
	95CI	0	6.69236	0	0	0	0	6.91728	0	3.23588	0	0	0	0	0	0	0	0	0	0.581631	0	0	0	0	0	0
Chaetodon lunulatus	n	3	3	0	0	0	0	43	0	6	1	1	1	0	0	0	0	0	0	3	0	0	0	0	0	0
	Resource selection ratio	0.807083	0.986346	0	0	0	0	14.6128	0	1.60802	0.344042	0.345489	1.83414	0	0	0	0	0	0	0.199202	0	0	0	0	0	0
	95CI	1.40399	1.71584	0	0	0	0	3.74049	0	1.92616	1.05434	1.05877	5.62086	0	0	0	0	0	0	0.34653	0	0	0	0	0	0
Chaetodon ephippium	n	0	0	0	0	0	0	5	0	0	0	0	0	0	0	0	0	0	2	3	0	0	0	0	0	0
	Resource selection ratio	0	0	0	0	0	0	10.3649	0	0	0	0	0	0	0	0	0	0	53.3366	1.21513	0	0	0	0	0	0
	95CI	0	0	0	0	0	0	10.128	0	0	0	0	0	0	0	0	0	0	104.235	1.81372	0	0	0	0	0	0
Chaetodon auriga	n	3	0	0	0	2	0	2	0	1	0	1	0	0	0	0	0	1	0	6	0	0	0	0	0	0
	Resource selection ratio	3.07701	0	0	0	17.9406	0	2.59122	0	1.02176	0	1.31718	0	0	0	0	0	1.35664	0	1.51892	0	0	0	0	0	0
	95CI	4.94809	0	0	0	36.6678	0	5.29604	0	3.057	0	3.94083	0	0	0	0	0	4.05889	0	1.51481	0	0	0	0	0	0
