# Supplementary material for: Nocturnal substrate association of four coral reef fish groups (parrotfishes, surgeonfishes, groupers and butterflyfishes) in relation to substrate architectural characteristics
Source: PeerJ. 2024 Jul 19;12:e17772. doi: 10.7717/peerj.17772 (PMC11262305; doi:10.7717/peerj.17772)
Supplement: Supplemental Information 37 [file peerj-12-17772-s037.xls]

## Sheet: Sheet1
Chlorurus microrhinos	Numerical data											Statistical significance
Left figure	Smaller-size (=< 29cm)			Medium-size (30-39cm)			Larger-size (>= 40cm)			Substrate		Smaller-size (=< 29cm)					Medium-size (30-39cm)					Larger-size (>= 40cm)
	Frequency (%)	n		Frequency (%)	n		Frequency (%)	n		Frequency (%)		Resource selection ratio	95% CI	Significance	Arrow		Resource selection ratio	95% CI	Significance	Arrow		Resource selection ratio	95% CI	Significance	Arrow
Eave-like	0	0		20	1		8.82353	1.5		13.071		0	0				1.53011	3.54459				0.675047	1.36311
Large inter-branch	100	2		80	4		11.7647	2		6.34385		15.7633	0	Positive	Black		12.6106	7.30335	Positive	Black		1.85451	3.19032
Overhang by fine branching	0	0		0	0		0	0		20.2754		0	0				0	0				0	0
Overhang by coarse structure	0	0		0	0		79.4118	13.5		29.6706		0	0				0	0				2.67645	0.856054	Positive	Black
Uneven	0	0		0	0		0	0		6.15179		0	0				0	0				0	0
Flat	0	0		0	0		0	0		23.197		0	0				0	0				0	0
Macroalgae	0	0		0	0		0	0		1.29039		0	0				0	0				0	0
Right figure	Smaller-size (=< 29cm)			Medium-size (30-39cm)			Larger-size (>= 40cm)			Substrate		Smaller-size (=< 29cm)					Medium-size (30-39cm)					Larger-size (>= 40cm)
	Frequency (%)	n		Frequency (%)	n		Frequency (%)	n		Frequency (%)		Resource selection ratio	95% CI	Significance	Arrow		Resource selection ratio	95% CI	Significance	Arrow		Resource selection ratio	95% CI	Significance	Arrow
Corymbose Acropora	0	0		0	0		2.94118	0.5		6.09359		0	0				0	0				0.482668	2.07797
Tabular Acropora	0	0		0	0		0	0		4.98612		0	0				0	0				0	0
Foliose coral	0	0		0	0		0	0		0.876332		0	0				0	0				0	0
Dead corymbose Acropora	0	0		0	0		5.88235	1		0.418212		0	0				0	0				14.0655	42.1647
Dead tabular Acropora	0	0		20	1		0	0		0.696742		0	0				28.705	79.3343				0	0
Dead foliose coral	0	0		0	0		0	0		0		0	0				0	0				0	0
Staghorn Acropora	100	2		80	4		11.7647	2		4.82399		20.7297	0	Positive	Black		16.5838	11.4585	Positive	Black		2.43879	5.00541
Dead staghorn Acropora	0	0		0	0		0	0		1.51986		0	0				0	0				0	0
Branching Acropora	0	0		0	0		0	0		6.11687		0	0				0	0				0	0
Bottlebrush Acropora	0	0		0	0		0	0		4.76495		0	0				0	0				0	0
Non-acroporid branching coral	0	0		0	0		0	0		4.745		0	0				0	0				0	0
Pocillopora	0	0		0	0		0	0		0.893793		0	0				0	0				0	0
Dead branching Acropora	0	0		0	0		0	0		1.00853		0	0				0	0				0	0
Dead bottlebruch Acropora	0	0		0	0		0	0		1.64707		0	0				0	0				0	0
Dead non-acroporid branching coral	0	0		0	0		0	0		1.0052		0	0				0	0				0	0
Dead Pocillopora	0	0		0	0		0	0		0.0939521		0	0				0	0				0	0
Massive coral	0	0		0	0		5.88235	1		4.60698		0	0				0	0				1.27683	3.82762
Dead massive coral	0	0		0	0		0	0		0.374977		0	0				0	0				0	0
Rock	0	0		0	0		73.5294	12.5		24.6886		0	0				0	0				2.97827	1.33921	Positive	Black
Other coral	0	0		0	0		0	0		5.45338		0	0				0	0				0	0
Dead other coral	0	0		0	0		0	0		0.0340888		0	0				0	0				0	0
Soft coral	0	0		0	0		0	0		0.664316		0	0				0	0				0	0
Coral rubble	0	0		0	0		0	0		18.2275		0	0				0	0				0	0
Sand	0	0		0	0		0	0		4.96949		0	0				0	0				0	0
Macroalgae	0	0		0	0		0	0		1.29039		0	0				0	0				0	0
