# Supplementary material for: Nocturnal substrate association of four coral reef fish groups (parrotfishes, surgeonfishes, groupers and butterflyfishes) in relation to substrate architectural characteristics
Source: PeerJ. 2024 Jul 19;12:e17772. doi: 10.7717/peerj.17772 (PMC11262305; doi:10.7717/peerj.17772)
Supplement: Supplemental Information 38 [file peerj-12-17772-s038.xls]

## Sheet: Sheet1
Chlorurus spilurus	Numerical data								Statistical significance
Left figure	Smaller-size (=< 29cm)			Medium-size (30-39cm)			Substrate		Smaller-size (=< 29cm)					Medium-size (30-39cm)
	Frequency (%)	n		Frequency (%)	n		Frequency (%)		Resource selection ratio	95% CI	Significance	Arrow		Resource selection ratio	95% CI	Significance	Arrow
Eave-like	53.125	17		23.0769	3		13.071		4.06434	1.74798	Positive	Black		1.76551	2.31546
Large inter-branch	25	8		46.1538	6		6.34385		3.94083	3.12516				7.27537	5.6449	Positive	Black
Overhang by fine branching	15.625	5		30.7692	4		20.2754		0.770639	0.819923				1.51757	1.63519
Overhang by coarse structure	6.25	2		0	0		29.6706		0.210646	0.373529	Negative	White		0	0
Uneven	0	0		0	0		6.15179		0	0				0	0
Flat	0	0		0	0		23.197		0	0				0	0
Macroalgae	0	0		0	0		1.29039		0	0				0	0
Right figure	Smaller-size (=< 29cm)			Medium-size (30-39cm)			Substrate		Smaller-size (=< 29cm)					Medium-size (30-39cm)
	Frequency (%)	n		Frequency (%)	n		Frequency (%)		Resource selection ratio	95% CI	Significance	Arrow		Resource selection ratio	95% CI	Significance	Arrow
Corymbose Acropora	12.5	4		16.6667	2		6.09359		2.05134	2.96462				2.52472	5.07437
Tabular Acropora	25	8		0	0		4.98612		5.01392	4.74375				0	0
Foliose coral	0	0		0	0		0.876332		0	0				0	0
Dead corymbose Acropora	3.125	1		8.33333	1		0.418212		7.47229	22.7257				18.3933	54.6057
Dead tabular Acropora	12.5	4		0	0		0.696742		17.9406	25.9281				0	0
Dead foliose coral	0	0		0	0		0		0	0				0	0
Staghorn Acropora	25	8		41.6667	6		4.82399		5.18244	4.90318				9.56758	8.8565
Dead staghorn Acropora	0	0		0	0		1.51986		0	0				0	0
Branching Acropora	0	0		0	0		6.11687		0	0				0	0
Bottlebrush Acropora	3.125	1		0	0		4.76495		0.65583	1.9946				0	0
Non-acroporid branching coral	9.375	3		33.3333	4		4.745		1.97576	3.3555				6.48456	8.33602
Pocillopora	0	0		0	0		0.893793		0	0				0	0
Dead branching Acropora	0	0		0	0		1.00853		0	0				0	0
Dead bottlebruch Acropora	0	0		0	0		1.64707		0	0				0	0
Dead non-acroporid branching coral	3.125	1		0	0		1.0052		3.10882	9.45496				0	0
Dead Pocillopora	0	0		0	0		0.0939521		0	0				0	0
Massive coral	0	0		0	0		4.60698		0	0				0	0
Dead massive coral	0	0		0	0		0.374977		0	0				0	0
Rock	6.25	2		0	0		24.6886		0.253153	0.535565	Negative	White		0	0
Other coral	0	0		0	0		5.45338		0	0				0	0
Dead other coral	0	0		0	0		0.0340888		0	0				0	0
Soft coral	0	0		0	0		0.664316		0	0				0	0
Coral rubble	0	0		0	0		18.2275		0	0				0	0
Sand	0	0		0	0		4.96949		0	0				0	0
Macroalgae	0	0		0	0		1.29039		0	0				0	0
