# Supplementary material for: Nocturnal substrate association of four coral reef fish groups (parrotfishes, surgeonfishes, groupers and butterflyfishes) in relation to substrate architectural characteristics
Source: PeerJ. 2024 Jul 19;12:e17772. doi: 10.7717/peerj.17772 (PMC11262305; doi:10.7717/peerj.17772)
Supplement: Supplemental Information 39 [file peerj-12-17772-s039.xls]

## Sheet: Sheet1
Hipposcarus longiceps	Numerical data											Statistical significance
Left figure	Smaller-size (=< 29cm)			Medium-size (30-39cm)			Larger-size (>= 40cm)			Substrate		Smaller-size (=< 29cm)					Medium-size (30-39cm)					Larger-size (>= 40cm)
	Frequency (%)	n		Frequency (%)	n		Frequency (%)	n		Frequency (%)		Resource selection ratio	95% CI	Significance	Arrow		Resource selection ratio	95% CI	Significance	Arrow		Resource selection ratio	95% CI	Significance	Arrow
Eave-like	12.5	1		0	0		66.6667	2		13.071		0.956316	2.31689				0	0				5.10035	5.39293
Large inter-branch	75	6		36.3636	4		0	0		6.34385		11.8225	6.25033	Positive	Black		5.73211	5.92157				0	0
Overhang by fine branching	12.5	1		0	0		0	0		20.2754		0.616512	1.49364				0	0				0	0
Overhang by coarse structure	0	0		63.6364	7		33.3333	1		29.6706		0	0				2.14476	1.26609				1.12345	2.37578
Uneven	0	0		0	0		0	0		6.15179		0	0				0	0				0	0
Flat	0	0		0	0		0	0		23.197		0	0				0	0				0	0
Macroalgae	0	0		0	0		0	0		1.29039		0	0				0	0				0	0
Right figure	Smaller-size (=< 29cm)			Medium-size (30-39cm)			Larger-size (>= 40cm)			Substrate		Smaller-size (=< 29cm)					Medium-size (30-39cm)					Larger-size (>= 40cm)
	Frequency (%)	n		Frequency (%)	n		Frequency (%)	n		Frequency (%)		Resource selection ratio	95% CI	Significance	Arrow		Resource selection ratio	95% CI	Significance	Arrow		Resource selection ratio	95% CI	Significance	Arrow
Corymbose Acropora	12.5	1		0	0		0	0		6.09359		2.05134	5.92925				0	0				0	0
Tabular Acropora	0	0		0	0		33.3333	1		4.98612		0	0				0	0				6.68523	16.8667
Foliose coral	0	0		0	0		0	0		0.876332		0	0				0	0				0	0
Dead corymbose Acropora	0	0		0	0		0	0		0.418212		0	0				0	0				0	0
Dead tabular Acropora	0	0		0	0		33.3333	1		0.696742		0	0				0	0				47.8417	120.703
Dead foliose coral	0	0		0	0		0	0		0		0	0				0	0				0	0
Staghorn Acropora	75	6		36.3636	4		0	0		4.82399		15.5473	9.80637	Positive	Black		7.53809	9.29057				0	0
Dead staghorn Acropora	0	0		0	0		0	0		1.51986		0	0				0	0				0	0
Branching Acropora	0	0		0	0		0	0		6.11687		0	0				0	0				0	0
Bottlebrush Acropora	0	0		0	0		0	0		4.76495		0	0				0	0				0	0
Non-acroporid branching coral	12.5	1		0	0		0	0		4.745		2.63435	7.61441				0	0				0	0
Pocillopora	0	0		0	0		0	0		0.893793		0	0				0	0				0	0
Dead branching Acropora	0	0		0	0		0	0		1.00853		0	0				0	0				0	0
Dead bottlebruch Acropora	0	0		0	0		0	0		1.64707		0	0				0	0				0	0
Dead non-acroporid branching coral	0	0		0	0		0	0		1.0052		0	0				0	0				0	0
Dead Pocillopora	0	0		0	0		0	0		0.0939521		0	0				0	0				0	0
Massive coral	0	0		0	0		0	0		4.60698		0	0				0	0				0	0
Dead massive coral	0	0		0	0		0	0		0.374977		0	0				0	0				0	0
Rock	0	0		63.6364	7		33.3333	1		24.6886		0	0				2.57756	1.81531				1.35015	3.40639
Other coral	0	0		0	0		0	0		5.45338		0	0				0	0				0	0
Dead other coral	0	0		0	0		0	0		0.0340888		0	0				0	0				0	0
Soft coral	0	0		0	0		0	0		0.664316		0	0				0	0				0	0
Coral rubble	0	0		0	0		0	0		18.2275		0	0				0	0				0	0
Sand	0	0		0	0		0	0		4.96949		0	0				0	0				0	0
Macroalgae	0	0		0	0		0	0		1.29039		0	0				0	0				0	0
