# Supplementary material for: Nocturnal substrate association of four coral reef fish groups (parrotfishes, surgeonfishes, groupers and butterflyfishes) in relation to substrate architectural characteristics
Source: PeerJ. 2024 Jul 19;12:e17772. doi: 10.7717/peerj.17772 (PMC11262305; doi:10.7717/peerj.17772)
Supplement: Supplemental Information 40 [file peerj-12-17772-s040.xls]

## Sheet: Sheet1
Scarus ghobban	Numerical data											Statistical significance
Left figure	Smaller-size (=< 29cm)			Medium-size (30-39cm)			Larger-size (>= 40cm)			Substrate		Smaller-size (=< 29cm)					Medium-size (30-39cm)					Larger-size (>= 40cm)
	Frequency (%)	n		Frequency (%)	n		Frequency (%)	n		Frequency (%)		Resource selection ratio	95% CI	Significance	Arrow		Resource selection ratio	95% CI	Significance	Arrow		Resource selection ratio	95% CI	Significance	Arrow
Eave-like	16.6667	0.5		36.3636	4		14.2857	1		13.071		1.27509	4.26348				2.78201	2.87396				1.09293	2.62072
Large inter-branch	33.3333	1		0	0		0	0		6.34385		5.25443	11.1117				0	0				0	0
Overhang by fine branching	0	0		0	0		14.2857	1		20.2754		0	0				0	0				0.704585	1.68951
Overhang by coarse structure	50	1.5		63.6364	7		71.4286	5		29.6706		1.68517	2.5199				2.14476	1.26609				2.40739	1.49048
Uneven	0	0		0	0		0	0		6.15179		0	0				0	0				0	0
Flat	0	0		0	0		0	0		23.197		0	0				0	0				0	0
Macroalgae	0	0		0	0		0	0		1.29039		0	0				0	0				0	0
Right figure	Smaller-size (=< 29cm)			Medium-size (30-39cm)			Larger-size (>= 40cm)			Substrate		Smaller-size (=< 29cm)					Medium-size (30-39cm)					Larger-size (>= 40cm)
	Frequency (%)	n		Frequency (%)	n		Frequency (%)	n		Frequency (%)		Resource selection ratio	95% CI	Significance	Arrow		Resource selection ratio	95% CI	Significance	Arrow		Resource selection ratio	95% CI	Significance	Arrow
Corymbose Acropora	16.6667	0.5		18.1818	2		14.2857	1		6.09359		2.73512	10.9109				2.98376	5.89702				2.34439	6.70678
Tabular Acropora	0	0		9.09091	1		0	0		4.98612		0	0				1.82324	5.37164				0	0
Foliose coral	0	0		0	0		0	0		0.876332		0	0				0	0				0	0
Dead corymbose Acropora	0	0		0	0		0	0		0.418212		0	0				0	0				0	0
Dead tabular Acropora	0	0		9.09091	1		0	0		0.696742		0	0				13.0477	38.4412				0	0
Dead foliose coral	0	0		0	0		0	0		0		0	0				0	0				0	0
Staghorn Acropora	33.3333	1		0	0		0	0		4.82399		6.90992	17.4335				0	0				0	0
Dead staghorn Acropora	0	0		0	0		0	0		1.51986		0	0				0	0				0	0
Branching Acropora	0	0		0	0		0	0		6.11687		0	0				0	0				0	0
Bottlebrush Acropora	0	0		0	0		0	0		4.76495		0	0				0	0				0	0
Non-acroporid branching coral	0	0		0	0		14.2857	1		4.745		0	0				0	0				3.01069	8.61293
Pocillopora	0	0		0	0		0	0		0.893793		0	0				0	0				0	0
Dead branching Acropora	0	0		0	0		0	0		1.00853		0	0				0	0				0	0
Dead bottlebruch Acropora	0	0		0	0		0	0		1.64707		0	0				0	0				0	0
Dead non-acroporid branching coral	0	0		0	0		0	0		1.0052		0	0				0	0				0	0
Dead Pocillopora	0	0		0	0		0	0		0.0939521		0	0				0	0				0	0
Massive coral	16.6667	0.5		18.1818	2		28.5714	2		4.60698		3.6177	14.4316				3.94658	7.7999				6.20177	11.4524
Dead massive coral	0	0		0	0		14.2857	1		0.374977		0	0				0	0				38.0976	108.989
Rock	33.3333	1		45.4545	5		28.5714	2		24.6886		1.35015	3.40639				1.84111	1.87903				1.15727	2.13705
Other coral	0	0		0	0		0	0		5.45338		0	0				0	0				0	0
Dead other coral	0	0		0	0		0	0		0.0340888		0	0				0	0				0	0
Soft coral	0	0		0	0		0	0		0.664316		0	0				0	0				0	0
Coral rubble	0	0		0	0		0	0		18.2275		0	0				0	0				0	0
Sand	0	0		0	0		0	0		4.96949		0	0				0	0				0	0
Macroalgae	0	0		0	0		0	0		1.29039		0	0				0	0				0	0
