# Supplementary material for: Nocturnal substrate association of four coral reef fish groups (parrotfishes, surgeonfishes, groupers and butterflyfishes) in relation to substrate architectural characteristics
Source: PeerJ. 2024 Jul 19;12:e17772. doi: 10.7717/peerj.17772 (PMC11262305; doi:10.7717/peerj.17772)
Supplement: Supplemental Information 41 [file peerj-12-17772-s041.xls]

## Sheet: Sheet1
Scarus forsteni	Numerical data											Statistical significance
Left figure	Smaller-size (=< 29cm)			Medium-size (30-39cm)			Larger-size (>= 40cm)			Substrate		Smaller-size (=< 29cm)					Medium-size (30-39cm)					Larger-size (>= 40cm)
	Frequency (%)	n		Frequency (%)	n		Frequency (%)	n		Frequency (%)		Resource selection ratio	95% CI	Significance	Arrow		Resource selection ratio	95% CI	Significance	Arrow		Resource selection ratio	95% CI	Significance	Arrow
Eave-like	90	9		0	0		100	1		13.071		6.88548	1.8798	Positive	Black		0	0				7.65053	0	Positive	Black
Large inter-branch	0	0		0	0		0	0		6.34385		0	0				0	0				0	0
Overhang by fine branching	0	0		0	0		0	0		20.2754		0	0				0	0				0	0
Overhang by coarse structure	10	1		100	1		0	0		29.6706		0.337034	0.828123				3.37034	0	Positive	Black		0	0
Uneven	0	0		0	0		0	0		6.15179		0	0				0	0				0	0
Flat	0	0		0	0		0	0		23.197		0	0				0	0				0	0
Macroalgae	0	0		0	0		0	0		1.29039		0	0				0	0				0	0
Right figure	Smaller-size (=< 29cm)			Medium-size (30-39cm)			Larger-size (>= 40cm)			Substrate		Smaller-size (=< 29cm)					Medium-size (30-39cm)					Larger-size (>= 40cm)
	Frequency (%)	n		Frequency (%)	n		Frequency (%)	n		Frequency (%)		Resource selection ratio	95% CI	Significance	Arrow		Resource selection ratio	95% CI	Significance	Arrow		Resource selection ratio	95% CI	Significance	Arrow
Corymbose Acropora	10	1		0	0		0	0		6.09359		1.64107	4.81068				0	0				0	0
Tabular Acropora	70	7		0	0		100	1		4.98612		14.039	8.98061	Positive	Black		0	0				20.0557	0	Positive	Black
Foliose coral	0	0		0	0		0	0		0.876332		0	0				0	0				0	0
Dead corymbose Acropora	0	0		0	0		0	0		0.418212		0	0				0	0				0	0
Dead tabular Acropora	10	1		0	0		0	0		0.696742		14.3525	42.0734				0	0				0	0
Dead foliose coral	0	0		0	0		0	0		0		0	0				0	0				0	0
Staghorn Acropora	0	0		0	0		0	0		4.82399		0	0				0	0				0	0
Dead staghorn Acropora	0	0		0	0		0	0		1.51986		0	0				0	0				0	0
Branching Acropora	0	0		0	0		0	0		6.11687		0	0				0	0				0	0
Bottlebrush Acropora	0	0		0	0		0	0		4.76495		0	0				0	0				0	0
Non-acroporid branching coral	0	0		0	0		0	0		4.745		0	0				0	0				0	0
Pocillopora	0	0		0	0		0	0		0.893793		0	0				0	0				0	0
Dead branching Acropora	0	0		0	0		0	0		1.00853		0	0				0	0				0	0
Dead bottlebruch Acropora	0	0		0	0		0	0		1.64707		0	0				0	0				0	0
Dead non-acroporid branching coral	0	0		0	0		0	0		1.0052		0	0				0	0				0	0
Dead Pocillopora	0	0		0	0		0	0		0.0939521		0	0				0	0				0	0
Massive coral	0	0		0	0		0	0		4.60698		0	0				0	0				0	0
Dead massive coral	0	0		0	0		0	0		0.374977		0	0				0	0				0	0
Rock	10	1		100	4		0	0		24.6886		0.405045	1.18736				4.05045	0	Positive	Black		0	0
Other coral	0	0		0	0		0	0		5.45338		0	0				0	0				0	0
Dead other coral	0	0		0	0		0	0		0.0340888		0	0				0	0				0	0
Soft coral	0	0		0	0		0	0		0.664316		0	0				0	0				0	0
Coral rubble	0	0		0	0		0	0		18.2275		0	0				0	0				0	0
Sand	0	0		0	0		0	0		4.96949		0	0				0	0				0	0
Macroalgae	0	0		0	0		0	0		1.29039		0	0				0	0				0	0
