# Supplementary material for: Nocturnal substrate association of four coral reef fish groups (parrotfishes, surgeonfishes, groupers and butterflyfishes) in relation to substrate architectural characteristics
Source: PeerJ. 2024 Jul 19;12:e17772. doi: 10.7717/peerj.17772 (PMC11262305; doi:10.7717/peerj.17772)
Supplement: Supplemental Information 42 [file peerj-12-17772-s042.xls]

## Sheet: Sheet1
Scarus niger	Numerical data								Statistical significance
Left figure	Smaller-size (=< 29cm)			Medium-size (30-39cm)			Substrate		Smaller-size (=< 29cm)					Medium-size (30-39cm)
	Frequency (%)	n		Frequency (%)	n		Frequency (%)		Resource selection ratio	95% CI	Significance	Arrow		Resource selection ratio	95% CI	Significance	Arrow
Eave-like	71.4286	5		37.5	1.5		13.071		5.46467	3.38333	Positive	Black		2.86895	4.79642
Large inter-branch	0	0		62.5	2.5		6.34385		0	0				9.85206	9.88263
Overhang by fine branching	0	0		0	0		20.2754		0	0				0	0
Overhang by coarse structure	28.5714	2		0	0		29.6706		0.962955	1.49048				0	0
Uneven	0	0		0	0		6.15179		0	0				0	0
Flat	0	0		0	0		23.197		0	0				0	0
Macroalgae	0	0		0	0		1.29039		0	0				0	0
Right figure	Smaller-size (=< 29cm)			Medium-size (30-39cm)			Substrate		Smaller-size (=< 29cm)					Medium-size (30-39cm)
	Frequency (%)	n		Frequency (%)	n		Frequency (%)		Resource selection ratio	95% CI	Significance	Arrow		Resource selection ratio	95% CI	Significance	Arrow
Corymbose Acropora	14.2857	1		0	0		6.09359		2.34439	6.70678				0	0
Tabular Acropora	42.8571	3		12.5	0.5		4.98612		8.5953	11.5915				2.50696	10.2477
Foliose coral	0	0		25	1		0.876332		0	0				28.528	76.3414
Dead corymbose Acropora	0	0		0	0		0.418212		0	0				0	0
Dead tabular Acropora	14.2857	1		0	0		0.696742		20.5036	58.6563				0	0
Dead foliose coral	0	0		0	0		0		0	0				0	0
Staghorn Acropora	0	0		62.5	2.5		4.82399		0	0				12.9561	15.5052
Dead staghorn Acropora	0	0		0	0		1.51986		0	0				0	0
Branching Acropora	0	0		0	0		6.11687		0	0				0	0
Bottlebrush Acropora	0	0		0	0		4.76495		0	0				0	0
Non-acroporid branching coral	0	0		0	0		4.745		0	0				0	0
Pocillopora	0	0		0	0		0.893793		0	0				0	0
Dead branching Acropora	0	0		0	0		1.00853		0	0				0	0
Dead bottlebruch Acropora	0	0		0	0		1.64707		0	0				0	0
Dead non-acroporid branching coral	0	0		0	0		1.0052		0	0				0	0
Dead Pocillopora	0	0		0	0		0.0939521		0	0				0	0
Massive coral	0	0		0	0		4.60698		0	0				0	0
Dead massive coral	0	0		0	0		0.374977		0	0				0	0
Rock	28.5714	2		0	0		24.6886		1.15727	2.13705				0	0
Other coral	0	0		0	0		5.45338		0	0				0	0
Dead other coral	0	0		0	0		0.0340888		0	0				0	0
Soft coral	0	0		0	0		0.664316		0	0				0	0
Coral rubble	0	0		0	0		18.2275		0	0				0	0
Sand	0	0		0	0		4.96949		0	0				0	0
Macroalgae	0	0		0	0		1.29039		0	0				0	0
