# Supplementary material for: Nocturnal substrate association of four coral reef fish groups (parrotfishes, surgeonfishes, groupers and butterflyfishes) in relation to substrate architectural characteristics
Source: PeerJ. 2024 Jul 19;12:e17772. doi: 10.7717/peerj.17772 (PMC11262305; doi:10.7717/peerj.17772)
Supplement: Supplemental Information 44 [file peerj-12-17772-s044.xls]

## Sheet: Sheet1
Scarus rivulatus	Numerical data								Statistical significance
Left figure	Smaller-size (=< 29cm)			Medium-size (30-39cm)			Substrate		Smaller-size (=< 29cm)					Medium-size (30-39cm)
	Frequency (%)	n		Frequency (%)	n		Frequency (%)		Resource selection ratio	95% CI	Significance	Arrow		Resource selection ratio	95% CI	Significance	Arrow
Eave-like	87.5	14		71.4286	5		0.13071		6.69421	1.63829	Positive	Black		5.46467	3.38333	Positive	Black
Large inter-branch	6.25	1		0	0		0.0634385		0.985206	2.47066				0	0
Overhang by fine branching	6.25	1		14.2857	1		0.202754		0.308256	0.77303				0.704585	1.68951
Overhang by coarse structure	0	0		14.2857	1		0.296706		0	0				0.481477	1.15452
Uneven	0	0		0	0		0.0615179		0	0				0	0
Flat	0	0		0	0		0.23197		0	0				0	0
Macroalgae	0	0		0	0		0.0129039		0	0				0	0
Right figure	Smaller-size (=< 29cm)			Medium-size (30-39cm)			Substrate		Smaller-size (=< 29cm)					Medium-size (30-39cm)
	Frequency (%)	n		Frequency (%)	n		Frequency (%)		Resource selection ratio	95% CI	Significance	Arrow		Resource selection ratio	95% CI	Significance	Arrow
Corymbose Acropora	6.25	1		0	0		0.0609359		1.02567	3.06868				0	0
Tabular Acropora	75	12		71.4286	5		0.0498612		15.0418	6.70868	Positive	Black		14.3255	10.5815	Positive	Black
Foliose coral	0	0		0	0		0.00876332		0	0				0	0
Dead corymbose Acropora	0	0		0	0		0.00418212		0	0				0	0
Dead tabular Acropora	6.25	1		0	0		0.00696742		8.97032	26.8381				0	0
Dead foliose coral	0	0		0	0		0		0	0				0	0
Staghorn Acropora	6.25	1		0	0		0.0482399		1.29561	3.87631				0	0
Dead staghorn Acropora	0	0		0	0		0.0151986		0	0				0	0
Branching Acropora	0	0		0	0		0.0611687		0	0				0	0
Bottlebrush Acropora	0	0		0	0		0.0476495		0	0				0	0
Non-acroporid branching coral	6.25	1		14.2857	1		0.04745		1.31718	3.94083				3.01069	8.61293
Pocillopora	0	0		0	0		0.00893793		0	0				0	0
Dead branching Acropora	0	0		0	0		0.0100853		0	0				0	0
Dead bottlebruch Acropora	0	0		0	0		0.0164707		0	0				0	0
Dead non-acroporid branching coral	0	0		0	0		0.010052		0	0				0	0
Dead Pocillopora	0	0		0	0		0.000939521		0	0				0	0
Massive coral	0	0		0	0		0.0460698		0	0				0	0
Dead massive coral	0	0		0	0		0.00374977		0	0				0	0
Rock	0	0		14.2857	1		0.246886		0	0				0.578635	1.65535
Other coral	0	0		0	0		0.0545338		0	0				0	0
Dead other coral	0	0		0	0		0.000340888		0	0				0	0
Soft coral	0	0		0	0		0.00664316		0	0				0	0
Coral rubble	0	0		0	0		0.182275		0	0				0	0
Sand	0	0		0	0		0.0496949		0	0				0	0
Macroalgae	0	0		0	0		0.0129039		0	0				0	0
