# Supplementary material for: Nocturnal substrate association of four coral reef fish groups (parrotfishes, surgeonfishes, groupers and butterflyfishes) in relation to substrate architectural characteristics
Source: PeerJ. 2024 Jul 19;12:e17772. doi: 10.7717/peerj.17772 (PMC11262305; doi:10.7717/peerj.17772)
Supplement: Supplemental Information 45 [file peerj-12-17772-s045.xls]

## Sheet: Sheet1
Naso unicornis	Numerical data											Statistical significance
Left figure	Smaller-size (=< 29cm)			Medium-size (30-39cm)			Larger-size (>= 40cm)			Substrate		Smaller-size (=< 29cm)					Medium-size (30-39cm)					Larger-size (>= 40cm)
	Frequency (%)	n		Frequency (%)	n		Frequency (%)	n		Frequency (%)		Resource selection ratio	95% CI	Significance	Arrow		Resource selection ratio	95% CI	Significance	Arrow		Resource selection ratio	95% CI	Significance	Arrow
Eave-like	100	1		40	2		7.69231	2		13.071		7.65053	0	Positive	Black		3.06021	4.34122				0.588502	1.0355
Large inter-branch	0	0		0	0		0	0		6.34385		0	0				0	0				0	0
Overhang by fine branching	0	0		0	0		3.84615	1		20.2754		0	0				0	0				0.189696	0.481771
Overhang by coarse structure	0	0		60	3		88.4615	23		29.6706		0	0				2.0222	1.91247				2.98146	0.546938	Positive	Black
Uneven	0	0		0	0		0	0		6.15179		0	0				0	0				0	0
Flat	0	0		0	0		0	0		23.197		0	0				0	0				0	0
Macroalgae	0	0		0	0		0	0		1.29039		0	0				0	0				0	0
Right figure	Smaller-size (=< 29cm)			Medium-size (30-39cm)			Larger-size (>= 40cm)			Substrate		Smaller-size (=< 29cm)					Medium-size (30-39cm)					Larger-size (>= 40cm)
	Frequency (%)	n		Frequency (%)	n		Frequency (%)	n		Frequency (%)		Resource selection ratio	95% CI	Significance	Arrow		Resource selection ratio	95% CI	Significance	Arrow		Resource selection ratio	95% CI	Significance	Arrow
Corymbose Acropora	0	0		0	0		0	0		6.09359		0	0				0	0				0	0
Tabular Acropora	0	0		40	2		7.69231	2		4.98612		0	0				8.02228	13.5774				1.54275	3.2386
Foliose coral	0	0		0	0		0	0		0.876332		0	0				0	0				0	0
Dead corymbose Acropora	0	0		0	0		0	0		0.418212		0	0				0	0				0	0
Dead tabular Acropora	100	1		0	0		0	0		0.696742		143.525	0	Positive	Black		0	0				0	0
Dead foliose coral	0	0		0	0		0	0		0		0	0				0	0				0	0
Staghorn Acropora	0	0		0	0		0	0		4.82399		0	0				0	0				0	0
Dead staghorn Acropora	0	0		0	0		0	0		1.51986		0	0				0	0				0	0
Branching Acropora	0	0		0	0		0	0		6.11687		0	0				0	0				0	0
Bottlebrush Acropora	0	0		0	0		0	0		4.76495		0	0				0	0				0	0
Non-acroporid branching coral	0	0		0	0		3.84615	1		4.745		0	0				0	0				0.81057	2.45602
Pocillopora	0	0		0	0		0	0		0.893793		0	0				0	0				0	0
Dead branching Acropora	0	0		0	0		0	0		1.00853		0	0				0	0				0	0
Dead bottlebruch Acropora	0	0		0	0		0	0		1.64707		0	0				0	0				0	0
Dead non-acroporid branching coral	0	0		0	0		0	0		1.0052		0	0				0	0				0	0
Dead Pocillopora	0	0		0	0		0	0		0.0939521		0	0				0	0				0	0
Massive coral	0	0		0	0		0	0		4.60698		0	0				0	0				0	0
Dead massive coral	0	0		0	0		3.84615	1		0.374977		0	0				0	0				10.257	31.0788
Rock	0	0		60	3		84.6154	22		24.6886		0	0				2.43027	2.74209				3.4273	0.885611	Positive	Black
Other coral	0	0		0	0		0	0		5.45338		0	0				0	0				0	0
Dead other coral	0	0		0	0		0	0		0.0340888		0	0				0	0				0	0
Soft coral	0	0		0	0		0	0		0.664316		0	0				0	0				0	0
Coral rubble	0	0		0	0		0	0		18.2275		0	0				0	0				0	0
Sand	0	0		0	0		0	0		4.96949		0	0				0	0				0	0
Macroalgae	0	0		0	0		0	0		1.29039		0	0				0	0				0	0
