# Supplementary material for: Nocturnal substrate association of four coral reef fish groups (parrotfishes, surgeonfishes, groupers and butterflyfishes) in relation to substrate architectural characteristics
Source: PeerJ. 2024 Jul 19;12:e17772. doi: 10.7717/peerj.17772 (PMC11262305; doi:10.7717/peerj.17772)
Supplement: Supplemental Information 46 [file peerj-12-17772-s046.xls]

## Sheet: Sheet1
Naso lituratus	Numerical data								Statistical significance
Left figure	Smaller-size (=< 29cm)			Medium-size (30-39cm)			Substrate		Smaller-size (=< 29cm)					Medium-size (30-39cm)
	Frequency (%)	n		Frequency (%)	n		Frequency (%)		Resource selection ratio	95% CI	Significance	Arrow		Resource selection ratio	95% CI	Significance	Arrow
Eave-like	52.6316	10		25	1		0.13071		4.0266	2.26977	Positive	Black		1.91263	4.29005
Large inter-branch	0	0		0	0		0.0634385		0	0				0	0
Overhang by fine branching	10.5263	2		25	1		0.202754		0.519168	0.899373				1.23302	2.76568
Overhang by coarse structure	36.8421	7		50	2		0.296706		1.2417	0.966013				1.68517	2.1823
Uneven	0	0		0	0		0.0615179		0	0				0	0
Flat	0	0		0	0		0.23197		0	0				0	0
Macroalgae	0	0		0	0		0.0129039		0	0				0	0
Right figure	Smaller-size (=< 29cm)			Medium-size (30-39cm)			Substrate		Smaller-size (=< 29cm)					Medium-size (30-39cm)
	Frequency (%)	n		Frequency (%)	n		Frequency (%)		Resource selection ratio	95% CI	Significance	Arrow		Resource selection ratio	95% CI	Significance	Arrow
Corymbose Acropora	10.5263	2		25	1		0.0609359		1.72744	3.57022				4.10267	10.9788
Tabular Acropora	42.1053	8		0	0		0.0498612		8.4445	7.01952	Positive	Black		0	0
Foliose coral	0	0		0	0		0.00876332		0	0				0	0
Dead corymbose Acropora	0	0		0	0		0.00418212		0	0				0	0
Dead tabular Acropora	0	0		0	0		0.00696742		0	0				0	0
Dead foliose coral	0	0		0	0		0		0	0				0	0
Staghorn Acropora	0	0		0	0		0.0482399		0	0				0	0
Dead staghorn Acropora	0	0		0	0		0.0151986		0	0				0	0
Branching Acropora	0	0		0	0		0.0611687		0	0				0	0
Bottlebrush Acropora	0	0		0	0		0.0476495		0	0				0	0
Non-acroporid branching coral	5.26316	1		0	0		0.04745		1.1092	3.33602				0	0
Pocillopora	0	0		25	1		0.00893793		0	0				27.9707	74.8501
Dead branching Acropora	0	0		0	0		0.0100853		0	0				0	0
Dead bottlebruch Acropora	0	0		0	0		0.0164707		0	0				0	0
Dead non-acroporid branching coral	0	0		0	0		0.010052		0	0				0	0
Dead Pocillopora	5.26316	1		0	0		0.000939521		56.0196	168.484				0	0
Massive coral	10.5263	2		0	0		0.0460698		2.28486	4.72227				0	0
Dead massive coral	0	0		0	0		0.00374977		0	0				0	0
Rock	26.3158	5		50	2		0.246886		1.06591	1.26439				2.02522	3.12897
Other coral	0	0		0	0		0.0545338		0	0				0	0
Dead other coral	0	0		0	0		0.000340888		0	0				0	0
Soft coral	0	0		0	0		0.00664316		0	0				0	0
Coral rubble	0	0		0	0		0.182275		0	0				0	0
Sand	0	0		0	0		0.0496949		0	0				0	0
Macroalgae	0	0		0	0		0.0129039		0	0				0	0
