# Supplementary material for: Nocturnal substrate association of four coral reef fish groups (parrotfishes, surgeonfishes, groupers and butterflyfishes) in relation to substrate architectural characteristics
Source: PeerJ. 2024 Jul 19;12:e17772. doi: 10.7717/peerj.17772 (PMC11262305; doi:10.7717/peerj.17772)
Supplement: Supplemental Information 48 [file peerj-12-17772-s048.xls]

## Sheet: Sheet1
Epinephalus ongus	Numerical data								Statistical significance
Left figure	Smaller-size (=< 29cm)			Medium-size (30-39cm)			Substrate		Smaller-size (=< 29cm)					Medium-size (30-39cm)					Larger-size (>= 40cm)
	Frequency (%)	n		Frequency (%)	n		Frequency (%)		Resource selection ratio	95% CI	Significance	Arrow		Resource selection ratio	95% CI	Significance	Arrow		Resource selection ratio	95% CI	Significance	Arrow
Eave-like	15.4639	15		0	0		13.071		1.18307	0.727422				0	0
Large inter-branch	15.4639	15		11.1111	1		6.34385		2.43762	1.49879				1.75148	4.27689
Overhang by fine branching	27.8351	27		33.3333	3		20.2754		1.37285	0.581305				1.64403	2.00726
Overhang by coarse structure	41.2371	40		55.5556	5		29.6706		1.38983	0.436298				1.87241	1.44586
Uneven	0	0		0	0		6.15179		0	0				0	0
Flat	0	0		0	0		23.197		0	0				0	0
Macroalgae	0	0		0	0		1.29039		0	0				0	0
Right figure	Smaller-size (=< 29cm)			Medium-size (30-39cm)			Substrate		Smaller-size (=< 29cm)					Medium-size (30-39cm)					Larger-size (>= 40cm)
	Frequency (%)	n		Frequency (%)	n		Frequency (%)		Resource selection ratio	95% CI	Significance	Arrow		Resource selection ratio	95% CI	Significance	Arrow		Resource selection ratio	95% CI	Significance	Arrow
Corymbose Acropora	5.15464	5		0	0		6.09359		0.845912	1.13843				0	0
Tabular Acropora	7.21649	7		0	0		4.98612		1.44732	1.6282				0	0
Foliose coral	0	0		0	0		0.876332		0	0				0	0
Dead corymbose Acropora	0	0		0	0		0.418212		0	0				0	0
Dead tabular Acropora	3.09278	3		0	0		0.696742		4.43892	7.79567				0	0
Dead foliose coral	0	0		0	0		0		0	0				0	0
Staghorn Acropora	14.433	14		11.1111	1		4.82399		2.99192	2.28559				2.30331	6.71017
Dead staghorn Acropora	1.03093	1		0	0		1.51986		0.678303	2.08512				0	0
Branching Acropora	2.06186	2		0	0		6.11687		0.337077	0.728868				0	0
Bottlebrush Acropora	2.06186	2		0	0		4.76495		0.432713	0.935662				0	0
Non-acroporid branching coral	18.5567	18		22.2222	2		4.745		3.91079	2.57048	Positive	Black		4.68329	9.02449
Pocillopora	1.03093	1		11.1111	1		0.893793		1.15343	3.54568				12.4314	36.2162
Dead branching Acropora	1.03093	1		0	0		1.00853		1.02221	3.1423				0	0
Dead bottlebruch Acropora	0	0		0	0		1.64707		0	0				0	0
Dead non-acroporid branching coral	3.09278	3		0	0		1.0052		3.07677	5.40345				0	0
Dead Pocillopora	0	0		0	0		0.0939521		0	0				0	0
Massive coral	6.18557	6		0	0		4.60698		1.34265	1.64052				0	0
Dead massive coral	0	0		0	0		0.374977		0	0				0	0
Rock	35.0515	34		55.5556	5		24.6886		1.41974	0.606336				2.25025	2.07306
Other coral	0	0		0	0		5.45338		0	0				0	0
Dead other coral	0	0		0	0		0.0340888		0	0				0	0
Soft coral	0	0		0	0		0.664316		0	0				0	0
Coral rubble	0	0		0	0		18.2275		0	0				0	0
Sand	0	0		0	0		4.96949		0	0				0	0
Macroalgae	0	0		0	0		1.29039		0	0				0	0
