# Supplementary material for: Nocturnal substrate association of four coral reef fish groups (parrotfishes, surgeonfishes, groupers and butterflyfishes) in relation to substrate architectural characteristics
Source: PeerJ. 2024 Jul 19;12:e17772. doi: 10.7717/peerj.17772 (PMC11262305; doi:10.7717/peerj.17772)
Supplement: Supplemental Information 49 [file peerj-12-17772-s049.xls]

## Sheet: Left figure
		Eave-like	Large inter-branch	Overhang by fine branching	Overhang by coarse structure	Uneven	Flat	Macroalgae
(A) Parrotfishes	n	111	41.5	16	56.5	0	0	0
	Oi	0.493333	0.184444	0.0711111	0.251111	0	0	0
	Pi	0.13071	0.0634385	0.202754	0.296706	0.0615179	0.23197	0.0129039
(B) Surgeonfishes	n	16	0	4	35	0	0	0
	Oi	0.290909	0	0.0727273	0.636364	0	0	0
	Pi	0.13071	0.0634385	0.202754	0.296706	0.0615179	0.23197	0.0129039
(C) Groupers	n	30	20	36	61	0	1	0
	Oi	0.202703	0.135135	0.243243	0.412162	0	0.00675676	0
	Pi	0.13071	0.0634385	0.202754	0.296706	0.0615179	0.23197	0.0129039
(D) Butterflyfishes	n	23	63	16	33	0	0	0
	Oi	0.17037	0.466667	0.118519	0.244444	0	0	0
	Pi	0.13071	0.0634385	0.202754	0.296706	0.0615179	0.23197	0.0129039

## Sheet: Right Figure
Right figures		Corymbose Acropora	Tabular Acropora	Foliose coral	Dead corymbose Acropora	Dead tabular Acropora	Dead foliose coral	Staghorn Acropora	Dead staghorn Acropora	Branching Acropora	Bottlebrush Acropora	Non-acroporid branching coral	Pocillopora	Dead branching Acropora	Dead bottlebruch Acropora	Dead non-acroporid branching coral	Dead Pocillopora	Massive coral	Dead massive coral	Rock	Other coral	Dead other coral	Soft coral	Coral rubble	Sand	Macroalgae
(A) Parrotfishes	n	31.5	58.5	2	4	15	0	41.5	0	0	2	13	0	0	0	1	0	7	1	48.5	0	0	0	0	0	0
	Oi	0.14	0.26	0.00888889	0.0177778	0.0666667	0	0.184444	0	0	0.00888889	0.0577778	0	0	0	0.00444444	0	0.0311111	0.00444444	0.215556	0	0	0	0	0	0
	Pi	0.0609359	0.0498612	0.00876332	0.00418212	0.00696742	0	0.0482399	0.0151986	0.0611687	0.0476495	0.04745	0.00893793	0.0100853	0.0164707	0.010052	0.000939521	0.0460698	0.00374977	0.246886	0.0545338	0.000340888	0.00664316	0.182275	0.0496949	0.0129039
(B) Surgeonfishes	n	3	12	0	0	1	0	0	0	0	0	2	1	0	0	0	1	2	1	32	0	0	0	0	0	0
	Oi	0.0545455	0.218182	0	0	0.0181818	0	0	0	0	0	0.0363636	0.0181818	0	0	0	0.0181818	0.0363636	0.0181818	0.581818	0	0	0	0	0	0
	Pi	0.0609359	0.0498612	0.00876332	0.00418212	0.00696742	0	0.0482399	0.0151986	0.0611687	0.0476495	0.04745	0.00893793	0.0100853	0.0164707	0.010052	0.000939521	0.0460698	0.00374977	0.246886	0.0545338	0.000340888	0.00664316	0.182275	0.0496949	0.0129039
(C) Groupers	n	11	13	0	1	5	0	18	2	3	2	23	3	1	0	4	0	9	1	51	0	0	0	1	0	0
	Oi	0.0743243	0.0878378	0	0.00675676	0.0337838	0	0.121622	0.0135135	0.0202703	0.0135135	0.155405	0.0202703	0.00675676	0	0.027027	0	0.0608108	0.00675676	0.344595	0	0	0	0.00675676	0	0
	Pi	0.0609359	0.0498612	0.00876332	0.00418212	0.00696742	0	0.0482399	0.0151986	0.0611687	0.0476495	0.04745	0.00893793	0.0100853	0.0164707	0.010052	0.000939521	0.0460698	0.00374977	0.246886	0.0545338	0.000340888	0.00664316	0.182275	0.0496949	0.0129039
(D) Butterflyfishes	n	8	13	0	0	2	0	63	0	10	1	3	2	0	0	0	0	2	2	29	0	0	0	0	0	0
	Oi	0.0592593	0.0962963	0	0	0.0148148	0	0.466667	0	0.0740741	0.00740741	0.0222222	0.0148148	0	0	0	0	0.0148148	0.0148148	0.214815	0	0	0	0	0	0
	Pi	0.0609359	0.0498612	0.00876332	0.00418212	0.00696742	0	0.0482399	0.0151986	0.0611687	0.0476495	0.04745	0.00893793	0.0100853	0.0164707	0.010052	0.000939521	0.0460698	0.00374977	0.246886	0.0545338	0.000340888	0.00664316	0.182275	0.0496949	0.0129039
