# Supplementary material for: Nocturnal substrate association of four coral reef fish groups (parrotfishes, surgeonfishes, groupers and butterflyfishes) in relation to substrate architectural characteristics
Source: PeerJ. 2024 Jul 19;12:e17772. doi: 10.7717/peerj.17772 (PMC11262305; doi:10.7717/peerj.17772)
Supplement: Supplemental Information 52 [file peerj-12-17772-s052.xls]

## Sheet: Sheet1
Species	Size class	Corymbose Acropora	Tabular Acropora	Foliose coral	Dead corymbose Acropora	Dead tabular Acropora	Dead foliose coral	Staghorn Acropora	Dead staghorn Acropora	Branching Acropora	Bottlebrush Acropora	Non-acroporid branching coral	Pocillopora	Dead branching Acropora	Dead bottlebruch Acropora	Dead non-acroporid branching coral	Dead Pocillopora	Massive coral	Dead massive coral	Rock	Other coral	Dead other coral	Soft coral	Coral rubble	Sand	Macroalgae
Chlorurus microrhinos	small	0	0	0	0	0	0	1	0	0	0	0	0	0	0	0	0	0	0	0	0	0	0	0	0	0
Chlorurus microrhinos	medium	0	0	0	0	0.2	0	0.8	0	0	0	0	0	0	0	0	0	0	0	0	0	0	0	0	0	0
Chlorurus microrhinos	large	0.0294118	0	0	0.0588235	0	0	0.117647	0	0	0	0	0	0	0	0	0	0.0588235	0	0.735294	0	0	0	0	0	0
Cholorurus spilurus	small	0.125	0.25	0	0.03125	0.125	0	0.25	0	0	0.03125	0.09375	0	0	0	0.03125	0	0	0	0.0625	0	0	0	0	0	0
Cholorurus spilurus	medium	0.166667	0	0	0.0833333	0	0	0.416667	0	0	0	0.333333	0	0	0	0	0	0	0	0	0	0	0	0	0	0
Hipposcarus longiceps	small	0.125	0	0	0	0	0	0.75	0	0	0	0.125	0	0	0	0	0	0	0	0	0	0	0	0	0	0
Hipposcarus longiceps	medium	0	0	0	0	0	0	0.363636	0	0	0	0	0	0	0	0	0	0	0	0.636364	0	0	0	0	0	0
Hipposcarus longiceps	large	0	0.333333	0	0	0.333333	0	0	0	0	0	0	0	0	0	0	0	0	0	0.333333	0	0	0	0	0	0
Scarus ghobban	small	0.166667	0	0	0	0	0	0.333333	0	0	0	0	0	0	0	0	0	0.166667	0	0.333333	0	0	0	0	0	0
Scarus ghobban	medium	0.181818	0.0909091	0	0	0.0909091	0	0	0	0	0	0	0	0	0	0	0	0.181818	0	0.454545	0	0	0	0	0	0
Scarus ghobban	large	0.142857	0	0	0	0	0	0	0	0	0	0.142857	0	0	0	0	0	0.285714	0.142857	0.285714	0	0	0	0	0	0
Scarus forsteni	small	0.1	0.7	0	0	0.1	0	0	0	0	0	0	0	0	0	0	0	0	0	0.1	0	0	0	0	0	0
Scarus forsteni	medium	0	0	0	0	0	0	0	0	0	0	0	0	0	0	0	0	0	0	1	0	0	0	0	0	0
Scarus forsteni	large	0	1	0	0	0	0	0	0	0	0	0	0	0	0	0	0	0	0	0	0	0	0	0	0	0
Scarsu niger	small	0.142857	0.428571	0	0	0.142857	0	0	0	0	0	0	0	0	0	0	0	0	0	0.285714	0	0	0	0	0	0
Scarsu niger	medium	0	0.125	0.25	0	0	0	0.625	0	0	0	0	0	0	0	0	0	0	0	0	0	0	0	0	0	0
Scarus oviceps	small	0.2	0.8	0	0	0	0	0	0	0	0	0	0	0	0	0	0	0	0	0	0	0	0	0	0	0
Scarus oviceps	medium	0.25	0.5	0	0	0	0	0	0	0	0	0	0	0	0	0	0	0	0	0.25	0	0	0	0	0	0
Scarus rivulatus	small	0.0625	0.75	0	0	0.0625	0	0.0625	0	0	0	0.0625	0	0	0	0	0	0	0	0	0	0	0	0	0	0
Scarus rivulatus	medium	0	0.714286	0	0	0	0	0	0	0	0	0.142857	0	0	0	0	0	0	0	0.142857	0	0	0	0	0	0
Scarus schlegeli	small	0.522727	0.136364	0.0454545	0	0.0454545	0	0	0	0	0	0.0454545	0	0	0	0	0	0.0681818	0	0.136364	0	0	0	0	0	0
Naso unicornis	small	0	0	0	0	1	0	0	0	0	0	0	0	0	0	0	0	0	0	0	0	0	0	0	0	0
Naso unicornis	medium	0	0.4	0	0	0	0	0	0	0	0	0	0	0	0	0	0	0	0	0.6	0	0	0	0	0	0
Naso unicornis	large	0	0.0769231	0	0	0	0	0	0	0	0	0.0384615	0	0	0	0	0	0	0.0384615	0.846154	0	0	0	0	0	0
Naso lituratus	small	0.105263	0.421053	0	0	0	0	0	0	0	0	0.0526316	0	0	0	0	0.0526316	0.105263	0	0.263158	0	0	0	0	0	0
Naso lituratus	medium	0.25	0	0	0	0	0	0	0	0	0	0	0.25	0	0	0	0	0	0	0.5	0	0	0	0	0	0
Plectropomus leopardus	small	0.0833333	0.0833333	0	0	0	0	0.0833333	0	0	0	0.25	0	0	0	0.0833333	0	0.0833333	0	0.25	0	0	0	0.0833333	0	0
Plectropomus leopardus	medium	0.25	0.25	0	0.0833333	0.0833333	0	0	0	0	0	0	0.0833333	0	0	0	0	0.0833333	0.0833333	0.0833333	0	0	0	0	0	0
Plectropomus leopardus	large	0	0.333333	0	0	0	0	0.166667	0	0	0	0	0	0	0	0	0	0	0	0.5	0	0	0	0	0	0
Epinepheus ongus	small	0.0515464	0.0721649	0	0	0.0309278	0	0.14433	0.0103093	0.0206186	0.0206186	0.185567	0.0103093	0.0103093	0	0.0309278	0	0.0618557	0	0.350515	0	0	0	0	0	0
Epinepheus ongus	medium	0	0	0	0	0	0	0.111111	0	0	0	0.222222	0.111111	0	0	0	0	0	0	0.555556	0	0	0	0	0	0
Chaetoson trifascialis	small	0	0.428571	0	0	0	0	0.428571	0	0.0952381	0	0	0	0	0	0	0	0	0	0.047619	0	0	0	0	0	0
Chaetodon lunulatus	small	0.0491803	0.0491803	0	0	0	0	0.704918	0	0.0983607	0.0163934	0.0163934	0.0163934	0	0	0	0	0	0	0.0491803	0	0	0	0	0	0
Chaetodon ephippium	small	0	0	0	0	0	0	0.5	0	0	0	0	0	0	0	0	0	0	0.2	0.3	0	0	0	0	0	0
Chaetodon auriga	small	0.1875	0	0	0	0.125	0	0.125	0	0.0625	0	0.0625	0	0	0	0	0	0.0625	0	0.375	0	0	0	0	0	0
