# Supplementary material for: Nocturnal substrate association of four coral reef fish groups (parrotfishes, surgeonfishes, groupers and butterflyfishes) in relation to substrate architectural characteristics
Source: PeerJ. 2024 Jul 19;12:e17772. doi: 10.7717/peerj.17772 (PMC11262305; doi:10.7717/peerj.17772)
Supplement: Supplemental Information 53 [file peerj-12-17772-s053.xlsx]

## Sheet: Table S1
Data from Table 3 raw data		Eave-like	Large inter-branch	Overhang by fine branching	Overhang by coarse structure	Uneven	Flat	Macroalgae		SUM
Chlorurus microrhinos	Resource selection ratio	0.79693	5.25443	0	1.89582	0	0	0		7.94718
Chlorurus spilurus	Resource selection ratio	3.40024	4.90414	0.986418	0.149793	0	0	0		9.44059
Hipposcarus longiceps	Resource selection ratio	1.04325	7.16514	0.224186	1.22558	0	0	0		9.65816
Scarus ghobban	Resource selection ratio	2.00371	0.750633	0.234862	2.16665	0	0	0		5.15585
Scarus forsteni	Resource selection ratio	5.10035	0	0	1.12345	0	0	0		6.2238
Scarus niger	Resource selection ratio	4.52077	3.58257	0	0.612789	0	0	0		8.71613
Scarus oviceps	Resource selection ratio	7.10406	0	0	0.240739	0	0	0		7.3448
Scarus rivulatus	Resource selection ratio	6.32	0.685361	0.428878	0.146537	0	0	0		7.58078
Scarus schlegeli	Resource selection ratio	5.7379	0	0.224186	0.689388	0	0	0		6.65147
Table S1
Chlorurus microrhinos	Standardized selectipon ratio	0.100278	0.66117	0	0.238552	0	0	0
Chlorurus spilurus	Standardized selectipon ratio	0.360172	0.519474	0.104487	0.0158669	0	0	0
Hipposcarus longiceps	Standardized selectipon ratio	0.108018	0.741874	0.0232121	0.126896	0	0	0
Scarus ghobban	Standardized selectipon ratio	0.388628	0.145589	0.0455524	0.420231	0	0	0
Scarus forsteni	Standardized selectipon ratio	0.819492	0	0	0.180508	0	0	0
Scarus niger	Standardized selectipon ratio	0.518667	0.411028	0	0.0703052	0	0	0
Scarus oviceps	Standardized selectipon ratio	0.967223	0	0	0.0327767	0	0	0
Scarus rivulatus	Standardized selectipon ratio	0.833688	0.0904077	0.0565743	0.01933	0	0	0
Scarus schlegeli	Standardized selectipon ratio	0.862651	0	0.0337047	0.103644	0	0	0
