# Supplementary material for: Nocturnal substrate association of four coral reef fish groups (parrotfishes, surgeonfishes, groupers and butterflyfishes) in relation to substrate architectural characteristics
Source: PeerJ. 2024 Jul 19;12:e17772. doi: 10.7717/peerj.17772 (PMC11262305; doi:10.7717/peerj.17772)
Supplement: Supplemental Information 54 [file peerj-12-17772-s054.xlsx]

## Sheet: Table S2
Right figures
Data from Table 4 raw data		Corymbose Acropora	Tabular Acropora	Foliose coral	Dead corymbose Acropora	Dead tabular Acropora	Dead foliose coral	Staghorn Acropora	Dead staghorn Acropora	Branching Acropora	Bottlebrush Acropora	Non-acroporid branching coral	Pocillopora	Dead branching Acropora	Dead bottlebruch Acropora	Dead non-acroporid branching coral	Dead Pocillopora	Massive coral	Dead massive coral	Rock	Other coral	Dead other coral	Soft coral	Coral rubble	Sand	Macroalgae		SUM
Chlorurus microrhinos	Resource selection ratio	0.34189	0	0	9.96306	5.98021	0	6.90992	0	0	0	0	0	0	0	0	0	0.904425	0	2.10961	0	0	0	0	0	0		26.2091
Chlorurus spilurus	Resource selection ratio	2.18809	3.56546	0	10.6273	12.7578	0	6.44926	0	0	0.466368	3.27831	0	0	0	2.21072	0	0	0	0.18002	0	0	0	0	0	0		41.7233
Hipposcarus longiceps	Resource selection ratio	0.745941	0.911622	0	0	6.52387	0	9.42261	0	0	0	0.957946	0	0	0	0	0	0	0	1.47289	0	0	0	0	0	0		20.0349
Scarus ghobban	Resource selection ratio	2.73512	0.955033	0	0	6.83453	0	0.987131	0	0	0	1.00356	0	0	0	0	0	4.65133	12.6992	1.54303	0	0	0	0	0	0		31.4089
Scarus forsteni	Resource selection ratio	1.09405	10.6964	0	0	9.56834	0	0	0	0	0	0	0	0	0	0	0	0	0	1.35015	0	0	0	0	0	0		22.7089
Scarus niger	Resource selection ratio	1.49188	6.38136	10.3738	0	13.0477	0	4.71131	0	0	0	0	0	0	0	0	0	0	0	0.736445	0	0	0	0	0	0		36.7425
Scarus oviceps	Resource selection ratio	3.51658	14.3255	0	0	0	0	0	0	0	0	0	0	0	0	0	0	0	0	0.289318	0	0	0	0	0	0		18.1314
Scarus rivulatus	Resource selection ratio	0.713509	14.8238	0	0	6.24022	0	0.901293	0	0	0	1.83259	0	0	0	0	0	0	0	0.176106	0	0	0	0	0	0		24.6875
Scarus schlegeli	Resource selection ratio	8.57832	2.73487	5.18691	0	6.52387	0	0	0	0	0	0.957946	0	0	0	0	0	1.47997	0	0.552334	0	0	0	0	0	0		26.0142
Raw data of Table S2
Chlorurus microrhinos	Standardized selectipon ratio	0.0130447	0	0	0.380137	0.228173	0	0.263646	0	0	0	0	0	0	0	0	0	0.034508	0	0.0804914	0	0	0	0	0	0
Chlorurus spilurus	Standardized selectipon ratio	0.052443	0.0854549	0	0.254708	0.305772	0	0.154572	0	0	0.0111777	0.0785726	0	0	0	0.0529852	0	0	0	0.00431462	0	0	0	0	0	0
Hipposcarus longiceps	Standardized selectipon ratio	0.0372321	0.0455018	0	0	0.325625	0	0.47031	0	0	0	0.0478139	0	0	0	0	0	0	0	0.0735163	0	0	0	0	0	0
Scarus ghobban	Standardized selectipon ratio	0.0870809	0.0304064	0	0	0.217598	0	0.0314284	0	0	0	0.0319515	0	0	0	0	0	0.148089	0.404318	0.0491271	0	0	0	0	0	0
Scarus forsteni	Standardized selectipon ratio	0.048177	0.471021	0	0	0.421347	0	0	0	0	0	0	0	0	0	0	0	0	0	0.0594546	0	0	0	0	0	0
Scarus niger	Standardized selectipon ratio	0.0406037	0.173678	0.282338	0	0.355112	0	0.128225	0	0	0	0	0	0	0	0	0	0	0	0.0200434	0	0	0	0	0	0
Scarus oviceps	Standardized selectipon ratio	0.19395	0.790094	0	0	0	0	0	0	0	0	0	0	0	0	0	0	0	0	0.0159567	0	0	0	0	0	0
Scarus rivulatus	Standardized selectipon ratio	0.0289016	0.600457	0	0	0.252768	0	0.0365081	0	0	0	0.0742316	0	0	0	0	0	0	0	0.00713343	0	0	0	0	0	0
Scarus schlegeli	Standardized selectipon ratio	0.329755	0.10513	0.199387	0	0.250781	0	0	0	0	0	0.036824	0	0	0	0	0	0.0568907	0	0.021232	0	0	0	0	0	0
