# Supplementary material for: Nocturnal substrate association of four coral reef fish groups (parrotfishes, surgeonfishes, groupers and butterflyfishes) in relation to substrate architectural characteristics
Source: PeerJ. 2024 Jul 19;12:e17772. doi: 10.7717/peerj.17772 (PMC11262305; doi:10.7717/peerj.17772)
Supplement: Supplemental Information 55 [file peerj-12-17772-s055.xlsx]

## Sheet: Table 5
Data from Table 5 raw data		Eave-like	Large inter-branch	Overhang by fine branching	Overhang by coarse structure	Uneven	Flat	Macroalgae		SUM
Naso unicornis	Resource selection ratio	1.1954	0	0.154128	2.7384	0	0	0		4.08793
Naso lituratus	Resource selection ratio	3.65895	0	0.643316	1.31883	0	0	0		5.6211
Plectropomus leopardus	Resource selection ratio	3.06021	1.05089	0.822015	1.12345	0	0.143697	0		6.20026
Epinephelus ongus	Resource selection ratio	1.08262	2.37937	1.39588	1.43081	0	0	0		6.28867
Chaetodon trifascialis	Resource selection ratio	3.2788	6.7557	0.469723	0.160492	0	0	0		10.6647
Chaetodon lunulatus	Resource selection ratio	0.752511	11.1118	0.727686	0.165754	0	0	0		12.7578
Chaetodon ephippium	Resource selection ratio	0	7.88165	0	1.68517	0	0	0		9.56682
Chaetodon auriga	Resource selection ratio	2.39079	1.97041	0.616512	1.47452	0	0	0		6.45224
										0
Raw data of Table S3
Naso unicornis	Standardized selectipon ratio	0.292421	0	0.0377032	0.669876	0	0	0
Naso lituratus	Standardized selectipon ratio	0.650932	0	0.114447	0.234621	0	0	0
Plectropomus leopardus	Standardized selectipon ratio	0.493562	0.169491	0.132578	0.181194	0	0.0231759	0
Epinephelus ongus	Standardized selectipon ratio	0.172154	0.378358	0.221967	0.227521	0	0	0
Chaetodon trifascialis	Standardized selectipon ratio	0.307444	0.633463	0.0440446	0.0150489	0	0	0
Chaetodon lunulatus	Standardized selectipon ratio	0.0589845	0.870985	0.0570386	0.0129924	0	0	0
Chaetodon ephippium	Standardized selectipon ratio	0	0.823853	0	0.176147	0	0	0
Chaetodon auriga	Standardized selectipon ratio	0.370537	0.305384	0.09555	0.228529	0	0	0
