# Supplementary material for: Nocturnal substrate association of four coral reef fish groups (parrotfishes, surgeonfishes, groupers and butterflyfishes) in relation to substrate architectural characteristics
Source: PeerJ. 2024 Jul 19;12:e17772. doi: 10.7717/peerj.17772 (PMC11262305; doi:10.7717/peerj.17772)
Supplement: Supplemental Information 56 [file peerj-12-17772-s056.xlsx]

## Sheet: Table 6
Data for raw data Table 6		Corymbose Acropora	Tabular Acropora	Foliose coral	Dead corymbose Acropora	Dead tabular Acropora	Dead foliose coral	Staghorn Acropora	Dead staghorn Acropora	Branching Acropora	Bottlebrush Acropora	Non-acroporid branching coral	Pocillopora	Dead branching Acropora	Dead bottlebruch Acropora	Dead non-acroporid branching coral	Dead Pocillopora	Massive coral	Dead massive coral	Rock	Other coral	Dead other coral	Soft coral	Coral rubble	Sand	Macroalgae		SUM
Naso unicornis	Resource selection ratio	0	2.50696	0	0	4.48516	0	0	0	0	0	0.658588	0	0	0	0	0	0	8.33384	3.16441	0	0	0	0	0	0		19.149
Naso lituratus	Resource selection ratio	2.14053	6.97589	0	0	0	0	0	0	0	0	0.916297	4.86447	0	0	0	46.277	1.88749	0	1.23275	0	0	0	0	0	0		64.2945
Plectropomus leopardus	Resource selection ratio	2.18809	4.01114	0	7.97044	4.78417	0	1.38198	0	0	0	2.10748	3.72943	0	0	3.31607	0	1.44708	8.88943	0.945105	0	0	0	0.182873	0	0		40.9533
Epinephelus ongus	Resource selection ratio	0.774089	1.32443	0	0	4.06203	0	2.93345	0.620711	0.308457	0.395973	3.97638	2.111	0.935417	0	2.81553	0	1.22865	0	1.49026	0	0	0	0	0	0		22.9764
Chaetodon trifascialis	Resource selection ratio	0	8.5953	0	0	0	0	8.88418	0	1.55698	0	0	0	0	0	0	0	0	0	0.192878	0	0	0	0	0	0		19.2293
Chaetodon lunulatus	Resource selection ratio	0.807083	0.986346	0	0	0	0	14.6128	0	1.60802	0.344042	0.345489	1.83414	0	0	0	0	0	0	0.199202	0	0	0	0	0	0		20.7371
Chaetodon ephippium	Resource selection ratio	0	0	0	0	0	0	10.3649	0	0	0	0	0	0	0	0	0	0	53.3366	1.21513	0	0	0	0	0	0		64.9166
Chaetodon auriga	Resource selection ratio	3.07701	0	0	0	17.9406	0	2.59122	0	1.02176	0	1.31718	0	0	0	0	0	1.35664	0	1.51892	0	0	0	0	0	0		28.8234
Naso unicornis	Standardized selectipon ratio	0	0.130919	0	0	0.234225	0	0	0	0	0	0.0343929	0	0	0	0	0	0	0.435211	0.165252	0	0	0	0	0	0
Naso lituratus	Standardized selectipon ratio	0.0332925	0.108499	0	0	0	0	0	0	0	0	0.0142516	0.0756592	0	0	0	0.719767	0.029357	0	0.0191734	0	0	0	0	0	0
Plectropomus leopardus	Standardized selectipon ratio	0.053429	0.0979442	0	0.194623	0.11682	0	0.0337453	0	0	0	0.0514606	0.0910653	0	0	0.0809721	0	0.0353349	0.217063	0.0230776	0	0	0	0.00446541	0	0
Epinephelus ongus	Standardized selectipon ratio	0.0336907	0.0576432	0	0	0.176791	0	0.127673	0.0270152	0.013425	0.0172339	0.173064	0.0918768	0.0407121	0	0.12254	0	0.0534746	0	0.0648605	0	0	0	0	0	0
Chaetodon trifascialis	Standardized selectipon ratio	0	0.446989	0	0	0	0	0.462012	0	0.0809688	0	0	0	0	0	0	0	0	0	0.0100304	0	0	0	0	0	0
Chaetodon lunulatus	Standardized selectipon ratio	0.0389198	0.0475643	0	0	0	0	0.704668	0	0.0775433	0.0165907	0.0166604	0.0884475	0	0	0	0	0	0	0.00960608	0	0	0	0	0	0
Chaetodon ephippium	Standardized selectipon ratio	0	0	0	0	0	0	0.159664	0	0	0	0	0	0	0	0	0	0	0.821617	0.0187184	0	0	0	0	0	0
Chaetodon auriga	Standardized selectipon ratio	0.106754	0	0	0	0.622434	0	0.0899	0	0.0354492	0	0.0456982	0	0	0	0	0	0.0470673	0	0.0526975	0	0	0	0	0	0
