# Supplementary material for: Nocturnal substrate association of four coral reef fish groups (parrotfishes, surgeonfishes, groupers and butterflyfishes) in relation to substrate architectural characteristics
Source: PeerJ. 2024 Jul 19;12:e17772. doi: 10.7717/peerj.17772 (PMC11262305; doi:10.7717/peerj.17772)
Supplement: Supplemental Information 57 [file peerj-12-17772-s057.xls]

## Sheet: Sheet1
Table S5		Eave-like	Large inter-branch	Overhang by fine branching	Overhang by coarse structure	Uneven	Flat	Macroalage
Parrotfishes	n	111	41.5	16	56.5	0	0	0
	W^I	3.77426	2.90745	0.350727	0.84633	0	0	0
	95CI	0.660437	1.05564	0.218872	0.252362		0
Surgeonfishes	n	16	0	4	35	0	0	0
	W^I	2.22561	0	0.358698	2.14476	0	0	0
	95CI	1.2135	0	0.447303	0.566211		0
Groupers	n	30	20	36	61	0	1	0
	W^I	1.55078	2.13018	1.1997	1.38913	0	0.0291277	0
	95CI	0.654788	1.14729	0.450504	0.353188		0.0751854
Butterflyfishes	n	23	63	16	33	0	0	0
	W^I	1.30342	7.35621	0.584544	0.823861	0	0	0
	95CI	0.641156	1.753	0.355356	0.322872		0
