# Supplementary material for: Nocturnal substrate association of four coral reef fish groups (parrotfishes, surgeonfishes, groupers and butterflyfishes) in relation to substrate architectural characteristics
Source: PeerJ. 2024 Jul 19;12:e17772. doi: 10.7717/peerj.17772 (PMC11262305; doi:10.7717/peerj.17772)
Supplement: Supplemental Information 58 [file peerj-12-17772-s058.xls]

## Sheet: Sheet1
Table S6		Corymbose Acropora	Tabular Acropora	Foliose coral	Dead corymbose Acropora	Dead tabular Acropora	Dead foliose coral	Staghorn Acropora	Dead staghorn Acropora	Branching Acropora	Bottlebrush Acropora	Non-acroporid branching coral	Pocillopora	Dead branching Acropora	Dead bottlebruch Acropora	Dead non-acroporid branching coral	Dead Pocillopora	Massive coral	Dead massive coral	Rock	Other coral	Dead other coral	Soft coral	Coral rubble	Sand	Macroalgae
Parrotfishes	n	31.5	58.5	2	4	15	0	41.5	0	0	2	13	0	0	0	1	0	7	1	48.5	0	0	0	0	0	0		225
	W^I	2.2975	5.21448	1.01433	4.2509	9.56834		3.82349	0	0	0.186547	1.21766	0	0	0	0.442143	0	0.675304	1.18526	0.873097	0	0	0	0	0	0
	95CI	1.17303	1.81221	2.2064	6.509	7.3751	#DIV/0!	1.65623	0	0	0.405783	1.01295	0	0	0	1.36318	0	0.776329	3.6543	0.343108	0	0	0	0	0	0
Surgeonfishes	n	3	12	0	0	1	0	0	0	0	0	2	1	0	0	0	1	2	1	32	0	0	0	0	0	0		55
	W^I	0.895129	4.37579	0	0	2.60955		0	0	0	0	0.766357	2.03423	0	0	0	19.3522	0.789316	4.84878	2.35662	0	0	0	0	0	0
	95CI	1.55276	3.45125	0	0	7.98986	#DIV/0!	0	0	0	0	1.64373	6.22837	0	0	0	59.2522	1.69298	14.8459	0.832447	0	0	0	0	0	0
Groupers	n	11	13	0	1	5	0	18	2	3	2	23	3	1	0	4	0	9	1	51	0	0	0	1	0	0		148
	W^I	1.21971	1.76165	0	1.61563	4.84882		2.52119	0.889127	0.331383	0.283602	3.27514	2.26789	0.669961	0	2.68871	0	1.31997	1.80191	1.39576	0	0	0	0.0370689	0	0
	95CI	1.09333	1.44192	0	4.9754	6.58638	#DIV/0!	1.72095	1.92954	0.585169	0.615458	1.93932	4.00474	2.06317	0	4.09753	0	1.31758	5.54906	0.488922	0	0	0	0.114155	0	0
Butterflyfishes	n	8	13	0	0	2	0	63	0	10	1	3	2	0	0	0	0	2	2	29	0	0	0	0	0	0		135
	W^I	0.972486	1.93129	0	0	2.1263		9.67388	0	1.21098	0.155456	0.468329	1.65752	0	0	0	0	0.321573	3.95086	0.870096	0	0	0	0	0	0
	95CI	1.03046	1.57343	0	0	4.61133	#DIV/0!	2.75035	0	1.13863	0.478577	0.82617	3.59469	0	0	0	0	0.6974	8.56828	0.442398	0	0	0	0	0	0
