# Supplementary material for: Nocturnal substrate association of four coral reef fish groups (parrotfishes, surgeonfishes, groupers and butterflyfishes) in relation to substrate architectural characteristics
Source: PeerJ. 2024 Jul 19;12:e17772. doi: 10.7717/peerj.17772 (PMC11262305; doi:10.7717/peerj.17772)
Supplement: Supplemental Information 59 [file peerj-12-17772-s059.xls]

## Sheet: Sheet1
Data from Table S5 raw data		Eave-like	Large inter-branch	Overhang by fine branching	Overhang by coarse structure	Uneven	Flat	Macroalage		Sum
Parrotfishes	Resource selection ratio	3.77426	2.90745	0.350727	0.84633	0	0	0		7.87877
Surgeonfishes	Resource selection ratio	2.22561	0	0.358698	2.14476	0	0	0		4.72907
Groupers	Resource selection ratio	1.55078	2.13018	1.1997	1.38913	0	0.0291277	0		6.29891
Butterflyfishes	Resource selection ratio	1.30342	7.35621	0.584544	0.823861	0	0	0		10.068
Raw data of Table S7
Parrotfishes	Standardized selection ratio	0.479042	0.369024	0.0445154	0.107419	0	0	0
Surgeonfishes	Standardized selection ratio	0.470623	0	0.0758495	0.453527	0	0	0
Groupers	Standardized selection ratio	0.246199	0.338182	0.190461	0.220534	0	0.00462424	0
Butterflyfishes	Standardized selection ratio	0.129462	0.73065	0.0580594	0.0818294	0	0	0
