# Supplementary material for: Nocturnal substrate association of four coral reef fish groups (parrotfishes, surgeonfishes, groupers and butterflyfishes) in relation to substrate architectural characteristics
Source: PeerJ. 2024 Jul 19;12:e17772. doi: 10.7717/peerj.17772 (PMC11262305; doi:10.7717/peerj.17772)
Supplement: Supplemental Information 60 [file peerj-12-17772-s060.xls]

## Sheet: Sheet1
Data from Table S6 raw data		Corymbose Acropora	Tabular Acropora	Foliose coral	Dead corymbose Acropora	Dead tabular Acropora	Dead foliose coral	Staghorn Acropora	Dead staghorn Acropora	Branching Acropora	Bottlebrush Acropora	Non-acroporid branching coral	Pocillopora	Dead branching Acropora	Dead bottlebruch Acropora	Dead non-acroporid branching coral	Dead Pocillopora	Massive coral	Dead massive coral	Rock	Other coral	Dead other coral	Soft coral	Coral rubble	Sand	Macroalgae
Parrotfishes	Resource selection ratio	2.2975	5.21448	1.01433	4.2509	9.56834		3.82349	0	0	0.186547	1.21766	0	0	0	0.442143	0	0.675304	1.18526	0.873097	0	0	0	0	0	0		30.749
Surgeonfishes	Resource selection ratio	0.895129	4.37579	0	0	2.60955		0	0	0	0	0.766357	2.03423	0	0	0	19.3522	0.789316	4.84878	2.35662	0	0	0	0	0	0		38.028
Groupers	Resource selection ratio	1.21971	1.76165	0	1.61563	4.84882		2.52119	0.889127	0.331383	0.283602	3.27514	2.26789	0.669961	0	2.68871	0	1.31997	1.80191	1.39576	0	0	0	0.0370689	0	0		26.9275
Butterflyfishes	Resource selection ratio	0.972486	1.93129	0	0	2.1263		9.67388	0	1.21098	0.155456	0.468329	1.65752	0	0	0	0	0.321573	3.95086	0.870096	0	0	0	0	0	0		23.3388
Raw data of Table S8
Parrotfishes	Standardized selection ratio	0.0747177	0.169582	0.0329873	0.138245	0.311175	0	0.124345	0	0	0.00606677	0.0395998	0	0	0	0.0143791	0	0.0219618	0.0385462	0.0283943	0	0	0	0	0	0
Surgeonfishes	Standardized selection ratio	0.0235387	0.115068	0	0	0.0686217	0	0	0	0	0	0.0201525	0.053493	0	0	0	0.508894	0.0207562	0.127506	0.0619708	0	0	0	0	0	0
Groupers	Standardized selection ratio	0.0452962	0.0654219	0	0.0599992	0.180069	0	0.0936286	0.0330193	0.0123065	0.0105321	0.121628	0.0842221	0.0248801	0	0.0998498	0	0.0490194	0.0669171	0.051834	0	0	0	0.00137662	0	0
Butterflyfishes	Standardized selection ratio	0.0416683	0.0827502	0	0	0.0911058	0	0.414498	0	0.0518871	0.00666085	0.0200666	0.0710201	0	0	0	0	0.0137785	0.169283	0.0372811	0	0	0	0	0	0
